# Supplementary material for: Metformin Decreases the Incidence of Pancreatic Ductal Adenocarcinoma Promoted by Diet-induced Obesity in the Conditional KrasG12D Mouse Model
Source: PubMed Central journal article supplement (PMC5897574; doi:10.1038/s41598-018-24337-8), 2018-04-12
Supplement: 41598_2018_24337_MOESM1_ESM.pdf [file 41598_2018_24337_MOESM1_ESM.pdf]

## Metformin Decreases the Incidence of Pancreatic Ductal Adenocarcinoma Promoted by Diet-induced Obesity in the Conditional KrasG12D Mouse Model

Hui-Hua Chang, Aune Moro, Caroline Ei Ne Chou, David W. Dawson, Samuel French, Andrea I. Schmidt, James Sinnott-Smith, Fang Hao, O. Joe Hines, Guido Eibl\*, and Enrique Rozengurt\* (\* Dual senior authorship).

**a**

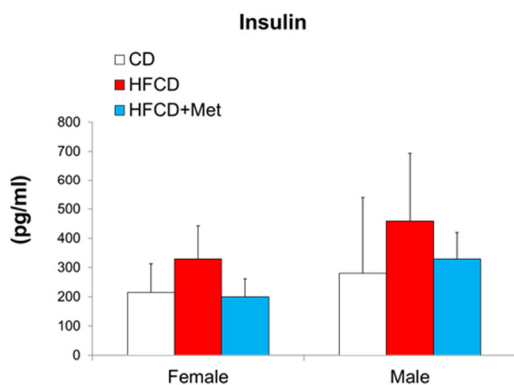

**b**

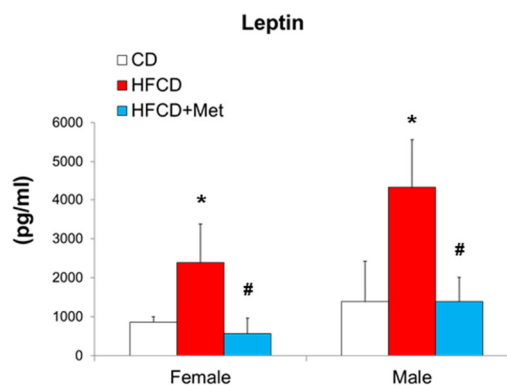

**Supplementary Figure S1.** Plasma concentrations (pg/ml) of insulin (**a**) and leptin (**b**) in female and male KC mice fed the CD, HFCD, or HFCD plus metformin (5 mg/ml in drinking water) at 3 months. Values are mean  $\pm$  s.d. \*;  $p < 0.05$  vs. CD, #;  $p < 0.05$  vs. HFCD.

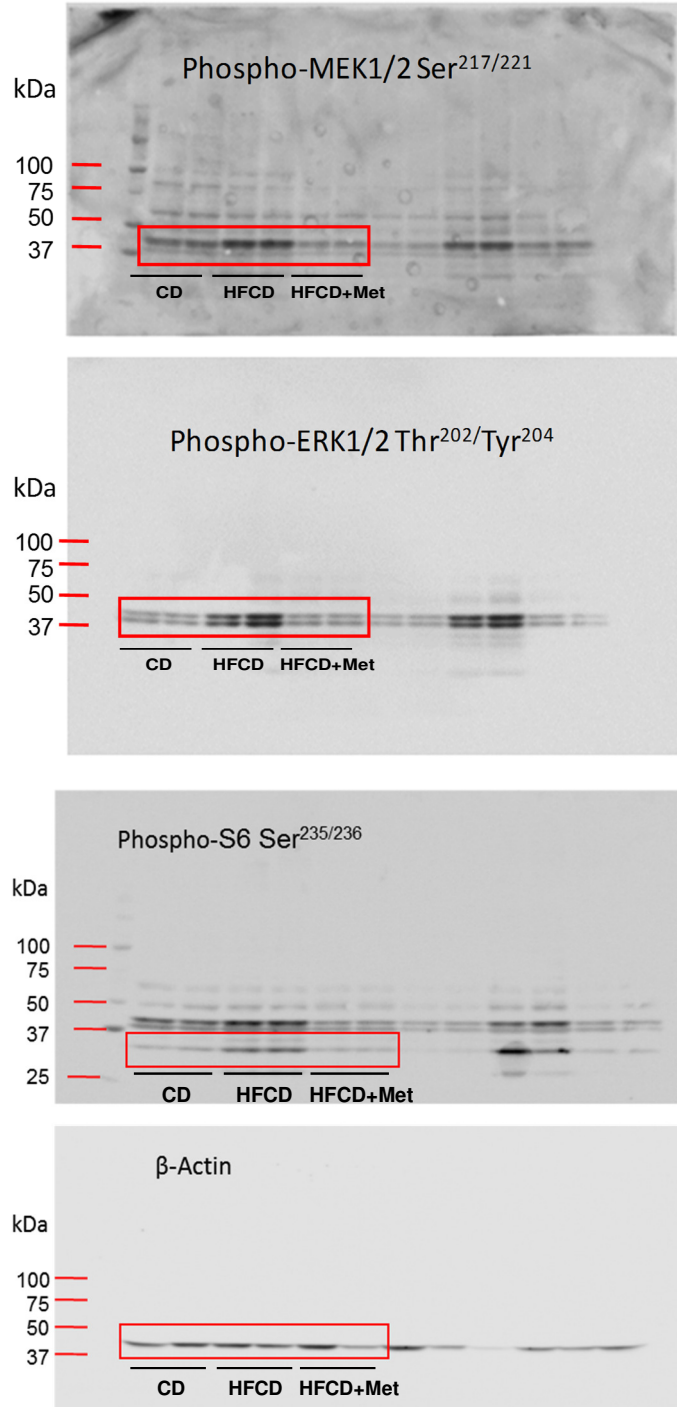

**Supplementary Figure S2. Uncropped images for Figure 3a (Part A).** Red outlines represent lanes shown in **Figure 3a**. All immunoblots were visualized via an LAS-4000 mini chemiluminescence image analyzer (Fujifilm Life Sciences, Tokyo, Japan).

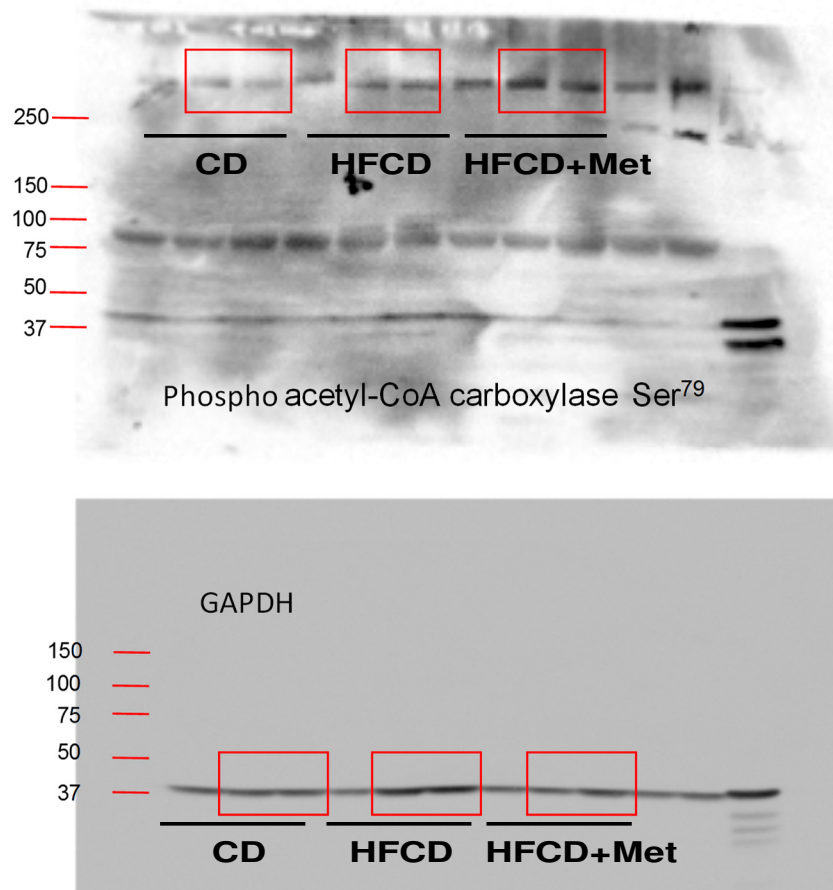

**Supplementary Figure S2. Uncropped images for Figure 3a (Part B).** Red outlines represent lanes shown in **Figure 3a**. All immunoblots were visualized via an LAS-4000 mini chemiluminescence image analyzer (Fujifilm Life Sciences, Tokyo, Japan).

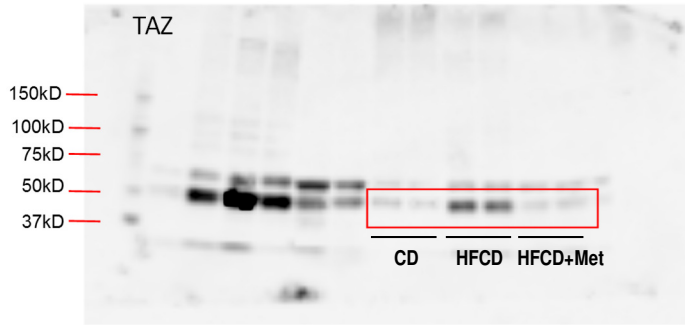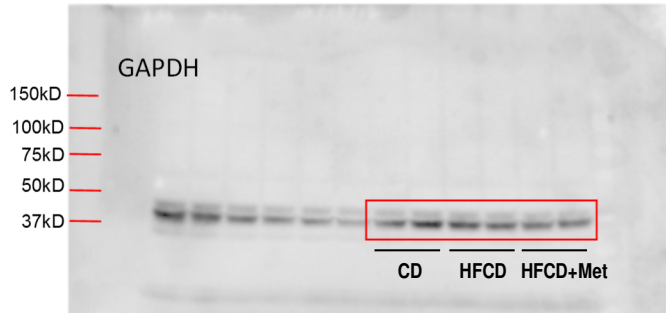

Uncropped images for Figure 5a

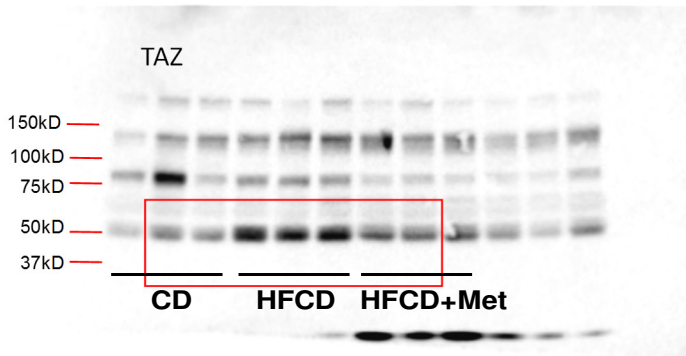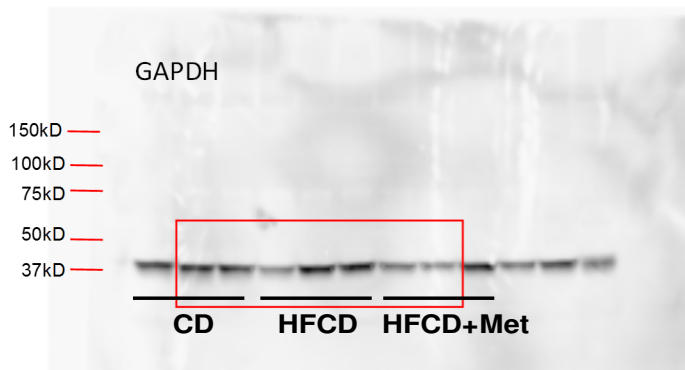

Uncropped images for Figure 5b

**Supplementary Figure S3. Uncropped images for Figure 5a and 5b.** Red outlines indicate lanes shown in **Figure 5a** and **5b**. All immunoblots were visualized via an LAS-4000 mini chemiluminescence image analyzer (Fujifilm Life Sciences, Tokyo, Japan).
